# Supplementary material for: Investigating the effects of PFOA accumulation and depuration on specific phospholipids in zebrafish through imaging mass spectrometry
Source: Royal Society of Chemistry journal article supplement (doi:10.1039/d3em00413a), 2023-11-30
Supplement: d3em00413a2.pdf [file d3em00413a2.pdf]

1     **Investigating the effects of PFOA accumulation and depuration on**  
2             **specific phospholipids in zebrafish through imaging mass**  
3                     **spectrometry**

4     *Qiuyue Shi<sup>a</sup>, Zhengfen Wan<sup>a</sup>, Shaoyong Lu<sup>\*a</sup>, Cheng Fang<sup>b,c</sup>, Changzhou Yan<sup>d</sup>, Xian Zhang<sup>\*d</sup>*

5     *a. State Key Laboratory of Environmental Criteria and Risk Assessment, National*  
6         *Engineering Laboratory for Lake Pollution Control and Ecological Restoration,*  
7         *State Environmental Protection Key Laboratory for Lake Pollution Control,*  
8         *Chinese Research Academy of Environmental Sciences, Beijing 100012, China*

9     *b. Global Centre for Environmental Remediation, University of Newcastle,*  
10         *Callaghan, NSW 2308, Australia*

11    *c. Cooperative Research Centre for Contamination Assessment and Remediation of*  
12         *the Environment, University of Newcastle, Callaghan, NSW 2308, Australia*

13    *d. Key Laboratory of Urban Environment and Health, Institute of Urban*  
14         *Environment, Chinese Academy of Sciences, Xiamen 361021, China*

15

16

17

18

19

20

21

22 Table S1. Phospholipid molecular species preliminary identified from LIPID

23 MAPS lipid database and the functions of difference phospholipids.

| Experimental <i>m/z</i>        | Theoretical<br><i>m/z</i> | Delta                    | Assignment  | Functions of the PL |
|--------------------------------|---------------------------|--------------------------|-------------|---------------------|
| 704.5793/704.5795              | 704.5589                  | 0.0204/0.0206            | PC (O-31:1) |                     |
| 734.5697                       | 734.5694                  | 0.0003                   | PC (32:0)   | Major constituents  |
| 760.5871-                      | 760.5851                  | 0.0023                   | PC (34:1)   | of cell membranes   |
| 760.5874/<br>760.5857          |                           |                          |             | and lipid signaling |
| 774.6038                       | 774.6007                  | 0.0031                   | PC (35:1)   |                     |
| 788.6161<br>/788.6061          | 788.6164                  | 0.0003                   | PC (36:1)   |                     |
| 806.5680/<br>806.5597          | 806.5670                  | 0.0010/0.0073            | PC (36:3)   |                     |
| 808.5863                       | 808.5851                  | 0.0012                   | PC (38:5)   |                     |
| 806.5759                       | 806.5694                  | 0.0065                   | PC (38:6)   |                     |
| 808.5831                       | 808.5827                  | 0.0004                   | PC (36:2)   |                     |
| 808.5738                       | 808.5617                  | 0.0121                   | PC (O-36:3) |                     |
| 829.6486                       | 829.6429                  | 0.0057                   | PC (38:3)   |                     |
| 762.5947/762.5945/<br>762.5940 | 762.6007                  | 0.0060/0.0062/<br>0.0130 | PC (34:0)   |                     |
| 792.5622                       | 792.5538                  | 0.0084                   | PC (37:6)   |                     |

|                    |          |                |              |                      |
|--------------------|----------|----------------|--------------|----------------------|
| 820.5903           | 820.5851 | 0.0052         | PC (39:6)    |                      |
| 832.5894           | 832.5851 | 0.0043         | PC (40:7)    |                      |
| 834.6020           | 834.6007 | 0.0013         | PC (40:6)    |                      |
| 786.5873           | 786.5773 | 0.0100         | PC (O-34:0)  |                      |
| 784.5631           | 784.5617 | 0.014          | PC (O-34:1)  |                      |
| 789.6192           | 789.6368 | 0.0176         | PA (42:0)    | Precursor for the    |
| 807.5791/807.5792/ | 807.5874 | 0.0083/0.0082/ | PA (42:2)    | biosynthesis of      |
| 807.5786           |          | 0.0088         |              | many other lipids    |
| 785.5873           | 785.5821 | 0.0052         | PA (O-40:0)  | and lipid signaling  |
| 759.5750           | 759.5898 | 0.0148         | PA (40:1)    |                      |
| 761.5913/761.5916  | 761.6055 | 0.0142/0.0139  | PA (40:0)    |                      |
| 703.5748           | 703.5636 | 0.0122         | PA (O-37:1)  |                      |
| 775.5974           | 775.5847 | 0.0127         | PG (O-37:2)  | DNA replication,     |
| 801.6165/          | 801.5980 | 0.0185/0.0148  | PG (O-37:0)  | modification of      |
| 801.6128           |          |                |              | cellular lipoprotein |
| 773.5823           | 773.5691 | 0.0132         | PG(0-37:3)   | and cell death       |
| 857.6907           | 857.6995 | 0.0088         | TG (49:1)    | Supply and store     |
| 703.5958           | 801.5980 | 0.0111         | TG (39:0)    | energy               |
| 735.5754           | 735.5898 | 0.0144         | DG (43:5)    | Reduce visceral fat, |
|                    |          |                |              | inhibit weight gain, |
|                    |          |                |              | reduce blood fat     |
| 703.5760/703.5758/ | 703.5748 | 0.0012/0.0010/ | SM(34:1; O2) | Membrane             |

|          |          |        |              |                      |
|----------|----------|--------|--------------|----------------------|
| 703.5763 |          | 0.0015 |              | components,          |
| 821.5799 | 821.5933 | 0.0134 | SM (40:3;O2) | cholesterol          |
|          |          |        |              | interactions &       |
|          |          |        |              | homeostasis          |
| 807.5788 | 807.5746 | 0.0042 | PI (O-34:0)  | Transfer protein and |
|          |          |        |              | cellular nanoreactor |
|          |          |        |              | for lipid signaling  |

24 Note: The mass accuracy of the instrument is less than 10 ppm. All phospholipid molecular

25 species preliminary identified through LIPID MAPS lipid database under mass tolerance  $\pm$

26 0.05 m/z. To increase confidence in the identification, some MS/MS data of high abundance

27 phospholipids were generated.

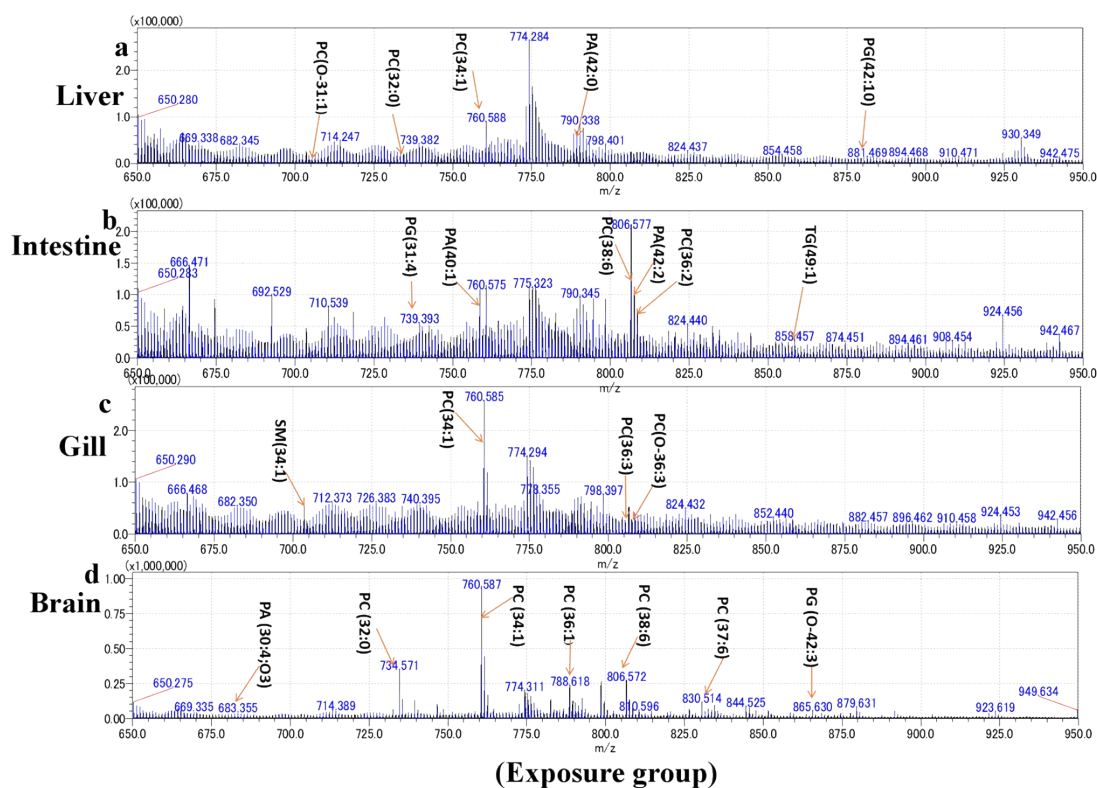

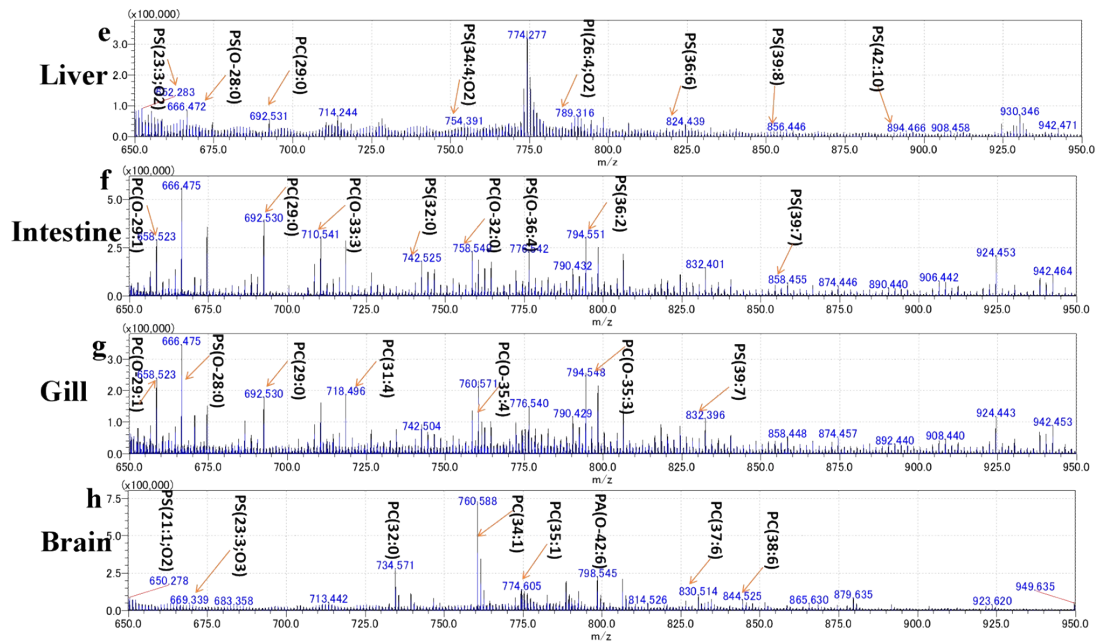

(Control group)

29  
 30 Figure S1: MALDI-TOF mass spectra from zebrafish tissues exposed to PFOA  
 31 solution in the positive ion mode (a-d: exposure group; e-h: control group). The mass  
 32 spectrum was from an average over the tissue area.

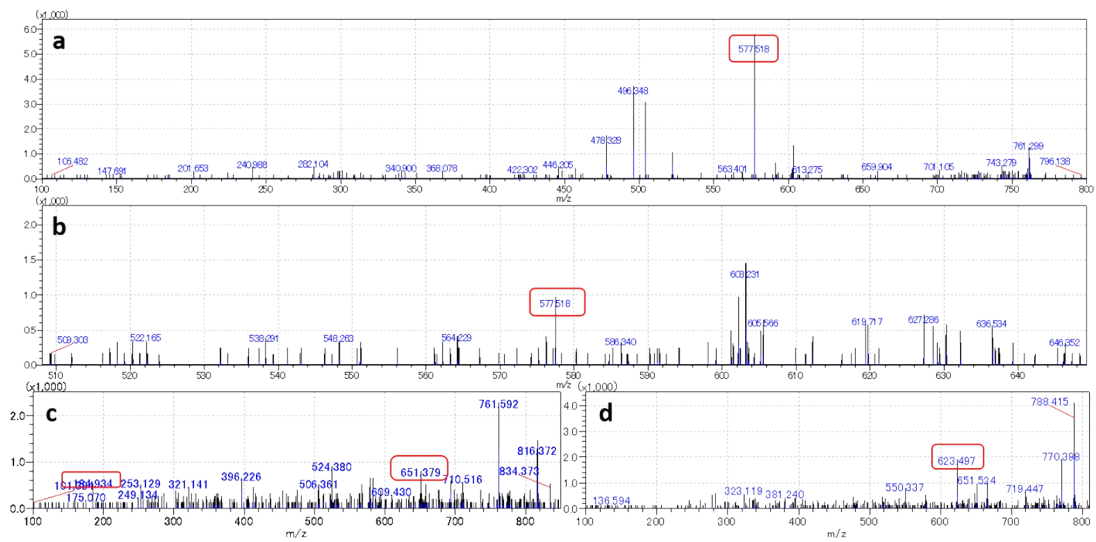

33  
 34 Figure S2: MALDI-MS/MS spectra of peaks at (a) m/z 760.585 acquired from PC  
 35 (32:1) standard; (b) 760.587, (c) 834.602, and (d) 806.568 acquired from a zebrafish  
 36 tissue. The red circle shows fragmented ion peaks from the neutral loss of  
 37 PHOSPHOCHOLINE (NL183Da).

38 Table S2. Phospholipid molecular species identified from MS/MS experiment directly  
 39 performed on the zebrafish tissue in positive ion mode.

| Experimental<br>m/z | Theoretical<br>m/z | Assignment | Structurally specific CID product ions (m/z) |                                            |
|---------------------|--------------------|------------|----------------------------------------------|--------------------------------------------|
|                     |                    |            | Phosphocholine                               | Neutral loss of<br>PHOSPHOCHOLINE(NL183Da) |
| 760.5874            | 760.5851           | PC (36:1)  | 184                                          | 577                                        |
| 834.6020            | 834.6007           | PC (40:6)  | 184                                          | 651                                        |
| 806.5680            | 806.5670           | PC (36:3)  | 184                                          | 623                                        |

40

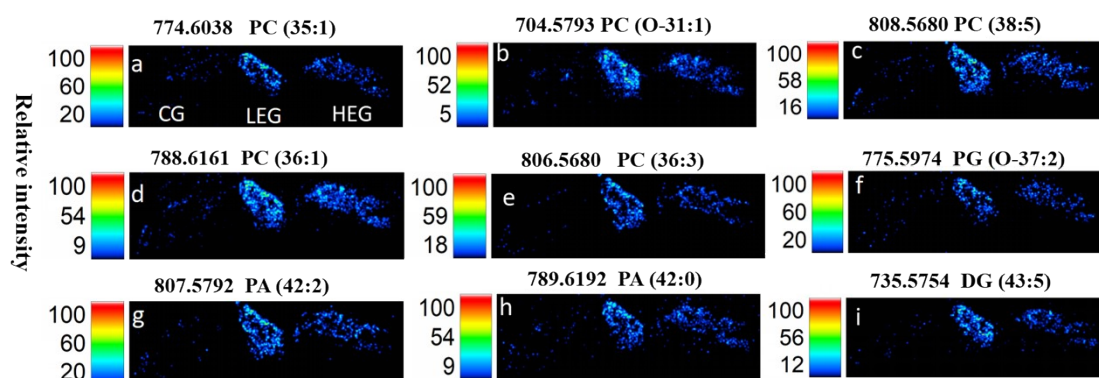

41

42 Figure S3. Visual distribution of phospholipids in zebrafish liver after PFOA exposure  
 43 and control group, a single *m/z* value was indicated for each images. (CG: control  
 44 group; LEG: low-exposure group; HEG: high-exposure group).

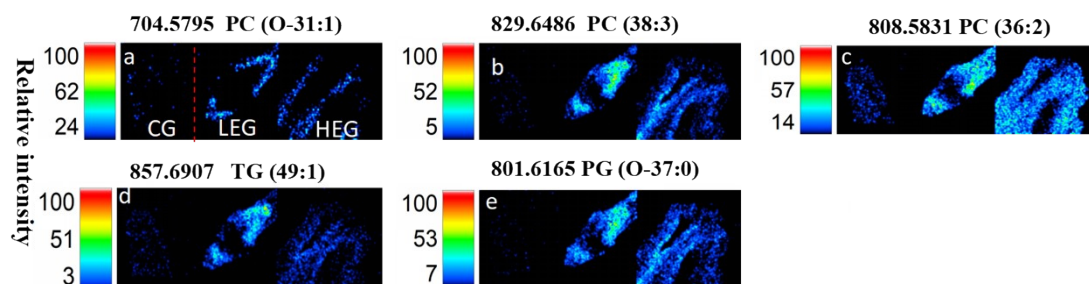

45

46 Figure S4. Visual distribution of phospholipids in zebrafish intestine after PFOA

47 exposure and control group, a single m/z value was indicated for each images.

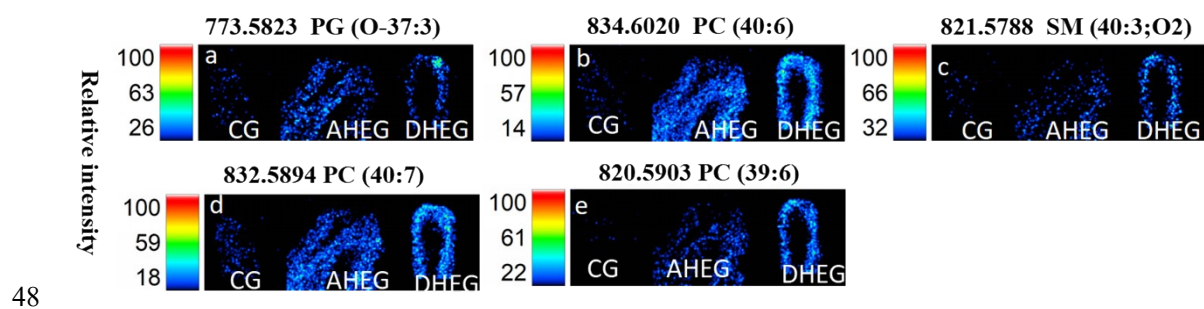

49 Figure S5. IMS of zebrafish intestine after PFOA exposure and control group during  
50 accumulation and depuration phase in the high-exposure group.
